# Supplementary material for: Plasmon-enhanced two-photon excitation fluorescence of rhodamine 6G and an Eu-diketonate complex by a picosecond diode laser
Source: Royal Society of Chemistry journal article supplement (doi:10.1039/c9an00247b), 2019-01-01
Supplement: c9an00247b1.pdf [file c9an00247b1.pdf]

## SUPPLEMENTARY MATERIAL

Plasmon-Enhanced Two-Photon Excitation Fluorescence of Rhodamine 6G and Eu-diketonate complex by Picosecond Diode Laser

Janice B. Rabor,<sup>a</sup> Koki Kawamura,<sup>a</sup> Junichi Kurawaki,<sup>a†</sup> and Yasuro Niidome<sup>\*a</sup>

<sup>a</sup>Department of Chemistry and Bioscience, Graduate School of Science and Engineering, Kagoshima University, 1-21-35 Korimoto, Kagoshima 890-0065, Japan.

\*Email: yniidome@sci.kagoshima-u.ac.jp

<sup>†</sup>Deceased January 5, 2019

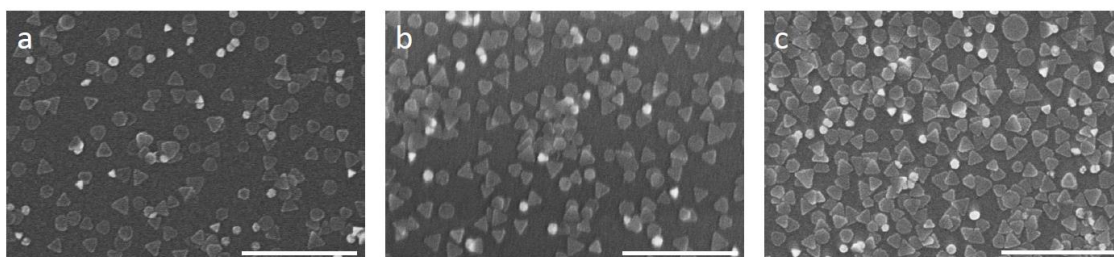

Fig. S1 SEM images of TSNP immobilized on glass substrate with an extinction of (a) 0.1, (b) 0.4 and (c) 0.6; scale bar = 500 nm.

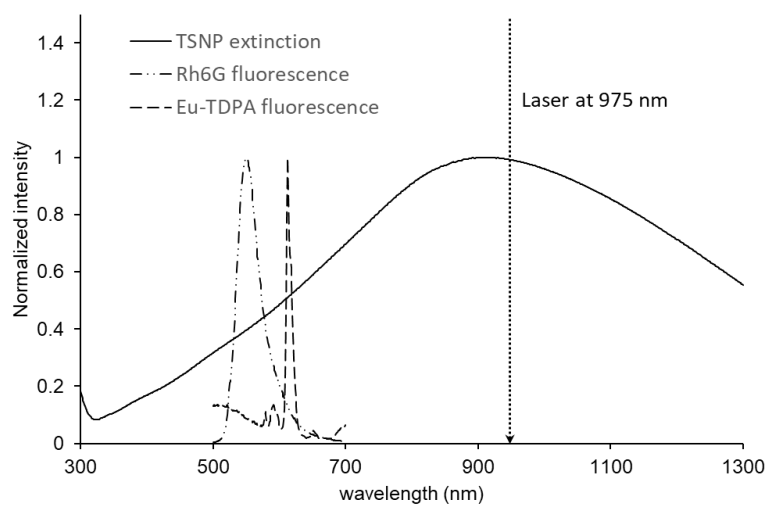

Fig. S2 Overlap between the extinction spectrum of TSNP and emission spectrum of Rh6G and Eu-TDPA.
